# Supplementary material for: Extended HPV Genotyping to Compare HPV Type Distribution in Self- and Provider-Collected Samples for Cervical Cancer Screening
Source: Oxford University Press journal article supplement (doi:10.1158/1055-9965.epi-20-0674), 2020-09-17
Supplement: 10559965epi200674-sup-242717_2_supp_6520272_qfkrl6.docx [file 10559965epi200674-sup-242717_2_supp_6520272_qfkrl6.docx]

**Supplementary Table S2:** Prevalence of hr-HPV types among all 85 CIN2+† cases, stratified by race and ethnicity

| **hr-HPV Type** | **Hispanic**  **n=32** | | **Non-Hispanic Black**  **n=13** | | **Non-Hispanic White**  **n=34** | | **Other**  **n=6** | |
| --- | --- | --- | --- | --- | --- | --- | --- | --- |
| **Self** | **Provider** | **Self** | **Provider** | **Self** | **Provider** | **Self** | **Provider** |
|  | **n (%)** | **n (%)** | **n (%)** | **n (%)** | **n (%)** | **n (%)** | **n (%)** | **n (%)** |
| **All hr-HPV*** | 29 (91%) | 31 (97%) | 12 (92%) | 12 (92%) | 32 (94%) | 31 (91%) | 6 (100%) | 6 (100%) |
| **16** | 13 (41%) | 13 (41%) | 5 (38%) | 2 (15%) | 18 (53%) | 16 (47%) | 3 (50%) | 3 (50%) |
| **18** | 2 (6%) | 3 (9%) | 3 (23%) | 2 (15%) | 2 (6%) | 1 (3%) | 0 (0%) | 0 (0%) |
| **31** | 3 (9%) | 3 (9%) | 2 (15%) | 2 (15%) | 2 (6%) | 1 (3%) | 2 (33%) | 2 (33%) |
| **45** | 2 (6%) | 3 (9%) | 2 (15%) | 0 (0%) | 2 (6%) | 2 (6%) | 0 (0%) | 0 (0%) |
| **33/58** | 5 (16%) | 5 (16%) | 2 (15%) | 1 (8%) | 3 (9%) | 3 (9%) | 0 (0%) | 0 (0%) |
| **35/39/68** | 2 (6%) | 2 (6%) | 3 (23%) | 4 (31%) | 8 (24%) | 8 (24%) | 0 (0%) | 0 (0%) |
| **51** | 1 (3%) | 1 (3%) | 0 (0%) | 0 (0%) | 6 (18%) | 6 (18%) | 1 (17%) | 1 (17%) |
| **52** | 5 (16%) | 5 (16%) | 4 (31%) | 4 (31%) | 3 (9%) | 3 (9%) | 1 (17%) | 1 (17%) |
| **56/59/66** | 2 (6%) | 2 (6%) | 4 (31%) | 4 (31%) | 11 (32%) | 11 (32%) | 0 (0%) | 0 (0%) |

*hr-HPV: Any of the 14 high-risk HPV types detected by the Onclarity assay

†CIN2+: Cervical intraepithelial neoplasia grade 2 or highe
